# Supplementary material for: Highly relaxing gadolinium based MRI contrast agents responsive to Mg2+ sensing
Source: Royal Society of Chemistry journal article supplement (doi:10.1039/c2cc30757j), 2012-01-01
Supplement: c2cc30757j.pdf [file c2cc30757j.pdf]

# Highly relaxing Gadolinium based MRI contrast Agent responsive to $\text{Mg}^{2+}$ sensing

Sabah Abada,<sup>a</sup> Alexandre Lecointre,<sup>a</sup> Mourad Elhabiri,<sup>b</sup> David Esteban-Gómez,<sup>c</sup> Carlos Platas-Iglesias,<sup>c</sup> Gaylord Tallec,<sup>d</sup> Marinella Mazzanti<sup>d</sup> and Loïc J. Charbonnière<sup>a\*</sup>

## Supplementary information (7 pages)

**Table S1.** Full results of the potentiometric data with experimental details.

**Table S2.** Longitudinal relaxivity values ( $r_1$ ) at pH=7.4, 25°C, in different conditions and experimental details of the relaxivity measurements.

**Figure S1.** Relaxivity of [GdL] at different concentrations of added  $\text{MgCl}_2$ , pH=7.4, 25°C

**Table S3.** Atomic coordinates obtained for  $[\text{GdH}_2\text{L}]^{3-}$  B3LYP/6-31G(d), aqueous solution (IEFPCM), 0 imaginary frequencies and full experimental details for the DFT modeling.

**Table S1.** Successive protonation constants ( $\log K_{LH_n}$ ) of the free ligand **L**,<sup>1</sup> formal stability constants ( $\log K_{ML}$ ), successive protonation constants ( $\log K_{MLH_n}$ ) and  $pM^e$  values of the lanthanides(III) complexes (Ln(III) = La(III), Nd(III), Eu(III), Tb(III), Er(III) and Lu(III)) with **L**.<sup>a</sup>

| Constant            | H <sup>+</sup> | M = Ln(III)  |              |              |              |              |              |              |
|---------------------|----------------|--------------|--------------|--------------|--------------|--------------|--------------|--------------|
|                     |                | La           | Nd           | Eu           | Gd           | Tb           | Er           | Lu           |
| $\log K_{LH}$       | 11.21(2)       |              |              |              |              |              |              |              |
| $\log K_{LH2}$      | 10.29(2)       |              |              |              |              |              |              |              |
| $\log K_{LH3}$      | 8.04(4)        |              |              |              |              |              |              |              |
| $\log K_{LH4}$      | 6.49(6)        |              |              |              |              |              |              |              |
| $\log K_{LH5}$      | 5.53(8)        |              |              |              |              |              |              |              |
| $\log K_{LH6}$      | 4.19(9)        |              |              |              |              |              |              |              |
| $\log K_{ML}$       |                | 25.5(3)      | 27.1(2)      | 25.7(2)      | <sup>d</sup> | 29.7(4)      | 29.7(7)      | 29.3(3)      |
| $\log K_{MLH}$      |                | 9.4(3)       | 8.8(2)       | 9.4(2)       | <sup>d</sup> | 7.6(5)       | 7.8(7)       | 7.4(4)       |
| $\log K_{MLH2}$     |                | 7.3(4)       | 6.6(3)       | 7.5(3)       | <sup>d</sup> | <sup>c</sup> | <sup>c</sup> | <sup>c</sup> |
| $\log K_{M(OH)}^b$  |                | -8.83        | -8.20        | -7.78        | -            | -7.66        | -7.54        | -7.29        |
|                     |                |              |              |              | 7.85         |              |              |              |
| $pM(\mathbf{L})$    |                | 21.2         | 22.1         | 21.5         | <sup>d</sup> | 23.6         | 23.7         | 23.1         |
| $pM(\mathbf{L}')^2$ |                | <sup>d</sup> | <sup>d</sup> | <sup>d</sup> | 17.5         | <sup>d</sup> | <sup>d</sup> | <sup>d</sup> |
| $pM(\text{DOTA})^3$ |                | 17.8         | 17.8         | 18.4         | 19.6         | 19.6         | 19.6         | 20.3         |
| $pM(\text{DOTP})^4$ |                | 21.5         | 21.2         | 21.5         | 22.5         | 22.6         | 24.3         | 24.3         |

<sup>a</sup> Solvent: water;  $I = 0.1 \text{ M}$  ( $\text{NaClO}_4$ );  $T = 25.0(2) \text{ }^\circ\text{C}$ . Errors =  $3\sigma$  with  $\sigma$  = standard deviation.  $K_{LH_n} = [\text{LH}_n]/[\text{LH}_{n-1}][\text{H}]$ ,  $K_{ML} = [\text{ML}]/([\text{L}][\text{M}]$  and  $K_{MLH_m} = [\text{MLH}_m]/[\text{MLH}_{m-1}][\text{H}]$ . Charges have been omitted for the sake of clarity. <sup>b</sup> The hydrolysis constants used for the processing of the potentiometric data on Ln(III) complexes with **L** have been taken from ref. 5. <sup>c</sup> non determined because of precipitation of the Ln(III) complexes below pH 6-6.5. <sup>d</sup> not determined. <sup>e</sup>  $pM = -\log [\text{Ln}^{3+}]_{\text{free}}$  with  $[\text{L}]_{\text{tot}} = 10^{-5} \text{ M}$  and  $[\text{Ln(III)}]_{\text{tot}} = 10^{-6} \text{ M}$  at pH 7.4.<sup>6</sup>

The thermodynamics of the Ln(III) complexes (Ln = La, Nd, Eu, Tb, Er and Lu) with ligand **L** was elucidated using potentiometric titrations as well as metal exchange competition experiments (with Cu(II) at pH 2.0) monitored by UV-visible absorption spectrophotometry. The formal stability  $K_{ML}$  constants were determined with, however, poor accuracy due to the formation of a precipitate below pH 6-6.5 regardless of the nature of the lanthanide(III) cation considered. This phenomenon is a common feature of several linear amino-

<sup>1</sup> (a) S. Abada, A. Lecointre, M. Elhabiri, L. J. Charbonnière, *Dalton Trans.* **2010**, 39, 9055-9062. (b) S. Abada, A. Lecointre, I. Déchamps-Olivier, C. Platas-Iglesias, C. Christine, M. Elhabiri, L. Charbonnière, *Radiochim. Acta*, **2011**, 99, 663-678.  
<sup>2</sup> L. Pellegatti, J. Zhang, B. Drahos, S. Villette, F. Suzenet, G. Guillaumet, S. petoud, É. Tóth, *Chem. Commun.* **2008**, 6591-6593.  
<sup>3</sup> W. P. Cacheris, S. K. Nickle, A. D. Sherry, *Inorg. Chem.* **1987**, 26, 958-960.  
<sup>4</sup> A. D. Sherry, J. Ren, J. Huskens, E. Brücher, É. Tóth, C. F. C. G. Geraldés, M. M. C. A. Castro, W. P. Cacheris, *Inorg. Chem.* **1996**, 35, 4604-4612.  
<sup>5</sup> G. D. Klungness, R. H. Byrne, *Polyhedron* **2000**, 19, 99-107.  
<sup>6</sup> W. R. Harris, C. J. Carrano, K. N. Raymond, *J. Am. Chem. Soc.* **1979**, 101, 2213.

polymethanephosphonates<sup>7</sup> and indicates that some protonated Ln(III) complexes are poorly soluble in water at concentrations about  $2 \times 10^{-3}$  M. As a consequence, the processing of the potentiometric data in this constrained pH range ( $6.5 \leq \text{pH} \leq 11$ ) led to the determination of only the higher protonation constants ( $K_{\text{MLH}}$  and  $K_{\text{MLH}_2}$ , Table S1). The progressive and monotonous increase in the formal  $K_{\text{ML}}$  stability constants as well as in the conditional  $K_{\text{ML}}^*$  stability constants measured at pH 2 ( $\log K_{\text{ML}}^* = 3.8(1)$  (La); 4.0(1) (Nd); 4.1(5) (Eu); 4.4(1) (Tb) and 4.42(7) (Er)) along the Ln(III) cation series is characteristic of chelates that are rather flexible and show increasing stability with charge density on the cation. Interestingly, the protonation constants decrease as the stabilities of the Ln(III) complexes increase indicating that the protons first attack the secondary amine units sites which are most likely involved in N-Ln(III) coordination bonds. Even though very scarce thermodynamic data were reported for the acetate analog of **L** (Table S1), the substitution of the acetate binding units by phosphonates seemingly leads to more stable lanthanide(III) species as a result of the higher overall basicity of the phosphonate-based chelator (for instance,  $\log \beta_{\text{LH}_4} = 36.03$  for **L** and  $\log \beta_{\text{L}'\text{H}_4} = 22.66$  for **L'**). This feature was already reported for many binding systems as illustrated in Table S1 for DOTA and DOTP. On the other hand, ligand **L** forms very stable Ln(III) complexes (as illustrated by the high pLn values, see Table S1) with respect to those formed with DOTA or DOTP.

### Relaxivity measurements

The samples were prepared in situ by mixing the appropriate amounts of ligand and  $\text{GdCl}_3 \cdot 6\text{H}_2\text{O}$  (99.99%; Aldrich) in mQ water followed by adjustment of the pH with NaOH solution in water (1M and 0.1M). Gd(III) stock solutions were prepared by dissolving the appropriate amounts of  $\text{GdCl}_3 \cdot 6\text{H}_2\text{O}$  in water. The exact Gd(III) ion concentration was determined by colorimetric titration in acetate buffer (pH=4.5) using standardized  $\text{H}_2\text{Na}_2\text{edta}$  solutions (Aldrich) and xylenol orange as the indicator. The absence of free gadolinium was checked by the xylenol orange test.

Similar conditions of concentration and pH have been used for the relaxivity studies of all the complexes ( $C^\circ = 2$  to 5mM). A stock solutions (~2 M) of  $\text{MgCl}_2$  was prepared by dissolving a precisely weighed mass of the salt in  $\text{H}_2\text{O}$  and neutralizing it to pH~7.4 with KOH or HCl solutions. The relaxivities of the complexes in the presence of Mg(II) were measured in

<sup>7</sup> K. Sawada, M. Kuribayashi, T. Suzuki, H. Miyamoto, *J. Sol. Chem.* **1991**, *20*, 829-839.

solutions prepared by mixing appropriate volumes of the corresponding Gd(III) complex and the anion stock solutions. The relaxivity at 200 MHz in presence of anion was compared to that in pure H<sub>2</sub>O at the same pH.

For the measurement in the serum, solutions have been prepared by mixing appropriate volumes of a stock solution of the corresponding complex, at pH~7.4 in water in fetal bovine serum (ligand~0.2 mM)

The 1/T<sub>1</sub> NMRD profiles were obtained at 298 K from 0.01 to 35 MHz using a Spinmaster FFC (Fast Field Cycling) NMR Relaxometer (Stelar, Italy).

**Table S2** . Longitudinal relaxivity values (r<sub>1</sub>) at pH=7.4, 25°C, in different conditions.

|                        | r <sub>1</sub> (mM <sup>-1</sup> .s <sup>-1</sup> ) |        |        |          |
|------------------------|-----------------------------------------------------|--------|--------|----------|
|                        | 35MHz                                               | 200MHz | 500MHz | nbr d'eq |
| AL090                  | 9,25                                                | 8,78   | 7,17   |          |
| AL090_carbonates       |                                                     | 7,39   | 6,36   | 200      |
| AL090_serum            | 15,75                                               | 7,16   | 3,92   |          |
| AL090_Ca <sup>2+</sup> |                                                     | 8,87   |        | 3        |
|                        |                                                     | 8,48   |        | 30       |
|                        |                                                     | 8,48   |        | 200      |
| AL090_Mg <sup>2+</sup> |                                                     | 8,59   |        | 0        |
|                        |                                                     | 9,01   |        | 1        |
|                        |                                                     | 9,09   |        | 3        |
|                        |                                                     | 9,53   |        | 5        |
|                        |                                                     | 10,05  |        | 10       |
|                        |                                                     | 10,23  |        | 20       |
|                        |                                                     | 10,89  |        | 25       |
|                        | 10,91                                               | 11,56  |        | 30       |
|                        |                                                     | 11,91  |        | 50       |
|                        |                                                     | 11,94  |        | 100      |
|                        |                                                     | 12,03  |        | 200      |

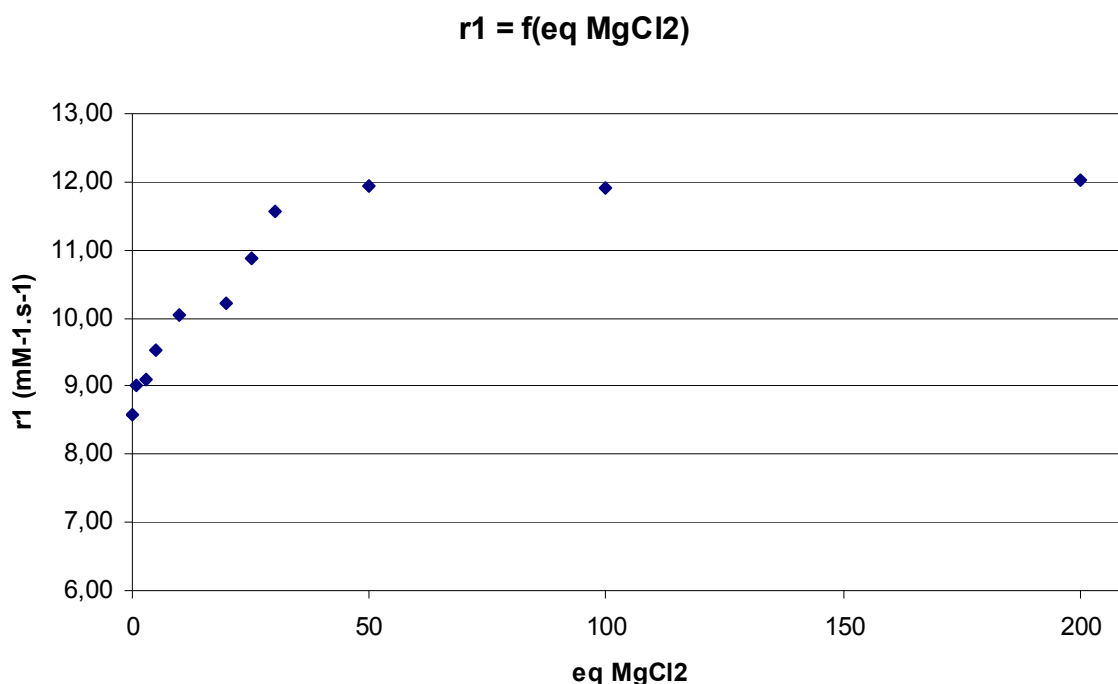

**Figure S1** Relaxivity of [GdL] at different concentrations of added MgCl<sub>2</sub>, pH=7.4, 25°C

**Computational details.** All calculations were performed employing hybrid DFT with the B3LYP exchange-correlation functional,<sup>8,9</sup> and the Gaussian 09 package (Revision C.01).<sup>10</sup> Full geometry optimizations of the [GdH<sub>2</sub>L]<sup>3-</sup> system were performed in aqueous solution by using the effective core potential (ECP) of Dolg et al. and the related [5s4p3d]-GTO valence basis set for the lanthanides,<sup>11</sup> and the 6-31G(d) basis set for C, H, N, O and P atoms. No symmetry constraints have been imposed during the optimizations. The default values for the integration grid (“fine”) and the SCF energy convergence criteria (10<sup>-8</sup>) were used. The

<sup>8</sup> A. D. Becke, *J. Chem. Phys.* 1993, **98**, 5648-5652.

<sup>9</sup> C. Lee, W. Yang, R. G. Parr, *Phys. Rev. B* 1988, **37**, 785-789.

<sup>10</sup> Gaussian 09, Revision A.1, M. J. Frisch, G. W. Trucks, H. B. Schlegel, G. E. Scuseria, M. A. Robb, J. R. Cheeseman, G. Scalmani, V. Barone, B. Mennucci, G. A. Petersson, H. Nakatsuji, M. Caricato, X. Li, H. P. Hratchian, A. F. Izmaylov, J. Bloino, G. Zheng, J. L. Sonnenberg, M. Hada, M. Ehara, K. Toyota, R. Fukuda, J. Hasegawa, M. Ishida, T. Nakajima, Y. Honda, O. Kitao, H. Nakai, T. Vreven, J. A. Montgomery, Jr., J. E. Peralta, F. Ogliaro, M. Bearpark, J. J. Heyd, E. Brothers, K. N. Kudin, V. N. Staroverov, R. Kobayashi, J. Normand, K. Raghavachari, A. Rendell, J. C. Burant, S. S. Iyengar, J. Tomasi, M. Cossi, N. Rega, J. M. Millam, M. Klene, J. E. Knox, J. B. Cross, V. Bakken, C. Adamo, J. Jaramillo, R. Gomperts, R. E. Stratmann, O. Yazyev, A. J. Austin, R. Cammi, C. Pomelli, J. W. Ochterski, R. L. Martin, K. Morokuma, V. G. Zakrzewski, G. A. Voth, P. Salvador, J. J. Dannenberg, S. Dapprich, A. D. Daniels, Ö. Farkas, J. B. Foresman, J. V. Ortiz, J. Cioslowski, and D. J. Fox, Gaussian, Inc., Wallingford CT, 2009.

<sup>11</sup> M. Dolg, H. Stoll, A. Savin, H. Preuss, *Theor. Chim. Acta* 1989, **75**, 173-194.

stationary points found on the potential energy surfaces as a result of the geometry optimizations have been tested to represent energy minima rather than saddle points via frequency analysis. Solvent effects were evaluated by using the polarizable continuum model (PCM), in which the solute cavity is built as an envelope of spheres centered on atoms or atomic groups with appropriate radii. In particular, we used the integral equation formalism (IEFPCM) variant as implemented in gaussian 09.<sup>12</sup>

**Table S3.** Atomic coordinates obtained for  $[\text{GdH}_2\text{L}]^{3-}$  B3LYP/6-31G(d), aqueous solution (IEFPCM), 0 imaginary frequencies

| Center Number | Atomic Number | Atomic Type | Coordinates (Angstroms) |           |           |
|---------------|---------------|-------------|-------------------------|-----------|-----------|
|               |               |             | X                       | Y         | Z         |
| 1             | 64            | 0           | 0.009096                | -0.712803 | -0.015637 |
| 2             | 6             | 0           | -1.132568               | 2.640901  | 0.634689  |
| 3             | 6             | 0           | -1.211990               | 4.037110  | 0.661077  |
| 4             | 1             | 0           | -2.055670               | 4.523791  | 1.139728  |
| 5             | 6             | 0           | -2.181043               | 1.810824  | 1.347299  |
| 6             | 7             | 0           | -2.427687               | 0.468264  | 0.786428  |
| 7             | 6             | 0           | -3.057201               | -0.409160 | 1.820538  |
| 8             | 1             | 0           | -4.147605               | -0.258718 | 1.849457  |
| 9             | 1             | 0           | -2.669100               | -0.114018 | 2.799726  |
| 10            | 6             | 0           | -3.288626               | 0.485052  | -0.422211 |
| 11            | 1             | 0           | -3.700986               | -0.523770 | -0.509902 |
| 12            | 1             | 0           | -4.131879               | 1.185002  | -0.303046 |
| 13            | 1             | 0           | -1.824802               | 1.671904  | 2.374586  |
| 14            | 1             | 0           | -3.115587               | 2.390853  | 1.416846  |
| 15            | 15            | 0           | -2.593110               | -2.198815 | 1.621100  |
| 16            | 8             | 0           | -1.014206               | -2.071202 | 1.554376  |
| 17            | 8             | 0           | -3.108891               | -2.935428 | 2.844889  |
| 18            | 8             | 0           | -3.123247               | -2.688657 | 0.246467  |
| 19            | 15            | 0           | -2.485263               | 0.756152  | -2.065366 |
| 20            | 8             | 0           | -3.430153               | 0.265478  | -3.126597 |
| 21            | 8             | 0           | -1.053255               | 0.189328  | -1.993202 |
| 22            | 8             | 0           | -2.347858               | 2.397161  | -2.237689 |
| 23            | 1             | 0           | 3.836509                | 0.156263  | -2.202143 |
| 24            | 6             | 0           | 2.865983                | -0.230945 | -1.848748 |
| 25            | 7             | 0           | 2.286676                | 0.657122  | -0.800129 |
| 26            | 1             | 0           | 2.179592                | -0.210886 | -2.702434 |
| 27            | 15            | 0           | 3.021415                | -2.017366 | -1.308736 |
| 28            | 6             | 0           | 1.881768                | 1.949329  | -1.377106 |
| 29            | 6             | 0           | 3.249468                | 0.823070  | 0.319680  |
| 30            | 8             | 0           | 1.606662                | -2.239136 | -0.603342 |
| 31            | 8             | 0           | 3.151569                | -2.822873 | -2.597400 |
| 32            | 8             | 0           | 4.169986                | -2.123521 | -0.301128 |
| 33            | 6             | 0           | 0.852262                | 2.712918  | -0.568715 |
| 34            | 1             | 0           | 1.426281                | 1.740871  | -2.352245 |
| 35            | 1             | 0           | 2.754136                | 2.595296  | -1.565649 |

<sup>12</sup> J. Tomasi, B. Mennucci, R. Cammi, *Chem. Rev.* 2005, **105**, 2999-3093.

|    |    |   |           |           |           |
|----|----|---|-----------|-----------|-----------|
| 36 | 1  | 0 | 3.914699  | -0.046605 | 0.296943  |
| 37 | 1  | 0 | 3.864991  | 1.725166  | 0.185557  |
| 38 | 15 | 0 | 2.534883  | 0.776388  | 2.016267  |
| 39 | 6  | 0 | 0.848445  | 4.109656  | -0.567456 |
| 40 | 7  | 0 | -0.113456 | 1.997941  | 0.040572  |
| 41 | 8  | 0 | 3.615956  | 0.427351  | 3.005639  |
| 42 | 8  | 0 | 1.271220  | -0.099044 | 1.928992  |
| 43 | 8  | 0 | 1.985121  | 2.305602  | 2.341115  |
| 44 | 6  | 0 | -0.199016 | 4.780505  | 0.062299  |
| 45 | 1  | 0 | 1.646536  | 4.655416  | -1.060316 |
| 46 | 1  | 0 | -0.230531 | 5.865960  | 0.074099  |
| 47 | 8  | 0 | -1.037928 | -2.716835 | -1.317220 |
| 48 | 1  | 0 | -1.849871 | -2.850008 | -0.719426 |
| 49 | 1  | 0 | -0.332250 | -3.309238 | -1.006273 |
| 50 | 1  | 0 | 2.662010  | 2.773811  | 2.858142  |
| 51 | 1  | 0 | -1.440954 | 2.678283  | -2.037212 |

-----  
E(RB3LYP) = -2975.11310932 Hartree

Zero-point correction = 0.352282

Thermal correction to Energy = 0.385869

Thermal correction to Enthalpy = 0.386814

Thermal correction to Gibbs Free Energy = 0.289575

Sum of electronic and zero-point Energies = -2974.760827

Sum of electronic and thermal Energies = -2974.727240

Sum of electronic and thermal Enthalpies = -2974.726296

Sum of electronic and thermal Free Energies = -2974.823534
